# Supplementary material for: DNA from mollusc shell: a valuable and underutilised substrate for genetic analyses
Source: PeerJ. 2020 Jul 30;8:e9420. doi: 10.7717/peerj.9420 (PMC7396136; doi:10.7717/peerj.9420)
Supplement: Supplemental Information 2 — Data shown for all subset samples tested. [file peerj-08-9420-s002.xlsx]

## Sheet: Sheet1
qPCR calculated DNA yields (ng/ ul)
							Cooked Shells				Beach cast shells
	Ageing Shell experiment
						Treatment	Animal			Beach	Animal
Animal	0 Month	1 Month	6 Months	13 Months			1	0.0387686			Aa	0.0441511
1	0.0753201	0.854154	0.039143	0.0783382		5min steam	2	0.00568672			Ac	undetermined				beach shell region Key:
2	0.0223891	0.896775	0.0353214	0.0169783			3	0.18072		Whareakeke	Ba	0.0175124				a) Ventral
3	0.25575	0.264635	not tested	0.0842318			4	0.00620524			Bc	0.00573245				b) Palial
4	0.00997253	0.00953733	0.0458878	0.0361687			5	0.272608			Cc	0.0354865				c) Umbo
5	0.52736	1.34331	0.0114633	not tested		10 min steam	6	undetermined			1a	0.00833423
6	0.569276	0.621177	0.0195428	0.0841623			7	0.0351474		Brighton	2a	undetermined
7	0.626082	0.00428523	0.0799314	0.0465099			8	0.335441			6b	undetermined
8	undetermined	0.0547275	0.000292651	0.0496164			9	0.378104			7b	undetermined
9	0.00898357	not tested	0.000244145	not tested		5 min embers	10	0.0896605
10	0.0178055	0.0121772	0.0307283	0.0757384			11	0.0349756
							12	0.595181
							13	0.151007
						10 min embers	14	0.169173
							15	0.219056
							16	0.294291
